# Supplementary material for: Bio-Mechanism of Catechin as Pheromone Signal Inhibitor: Prediction of Antibacterial Agent Action Mode by In Vitro and In Silico Study
Source: MDPI journal article supplement (doi:10.3390/molecules26216381), 2021-10-22
Supplement: s1 [file s1]

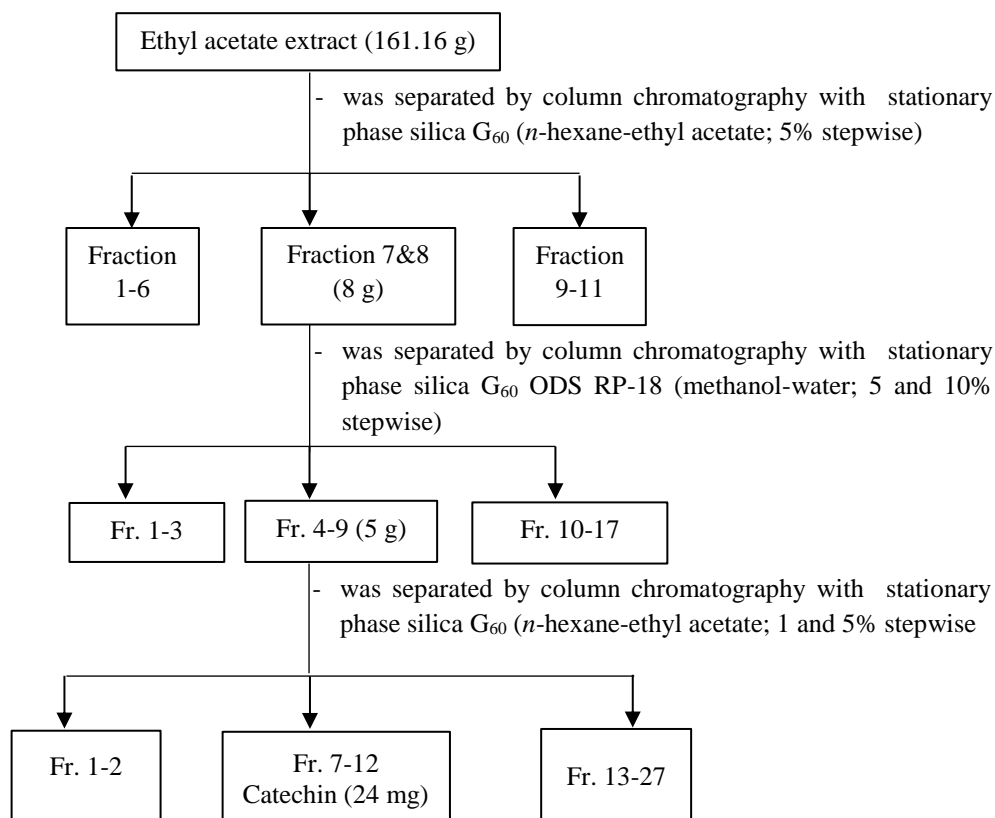

Figure S1. Scheme of isolation

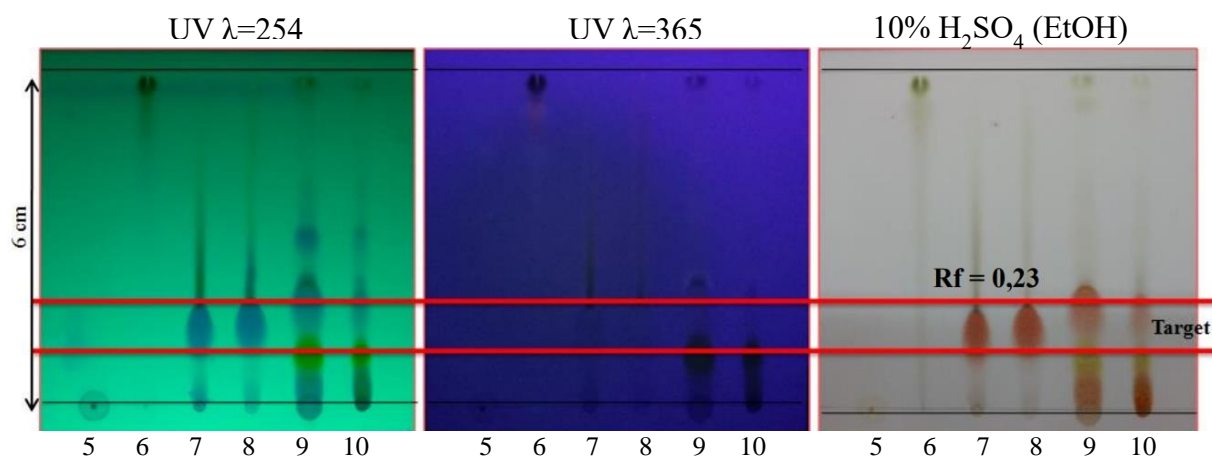

Figure S2. Chromatogram of the first separation

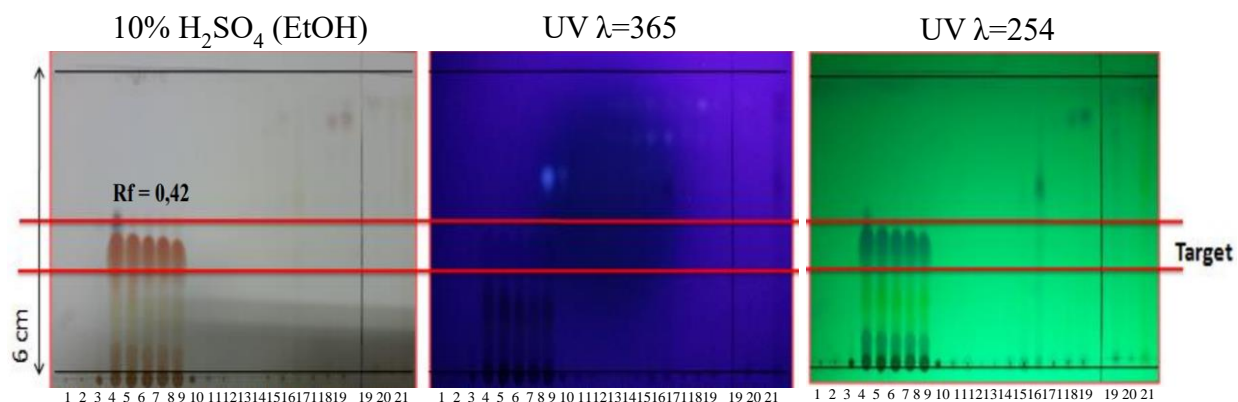

Figure S3. Chromatogram of the second separation

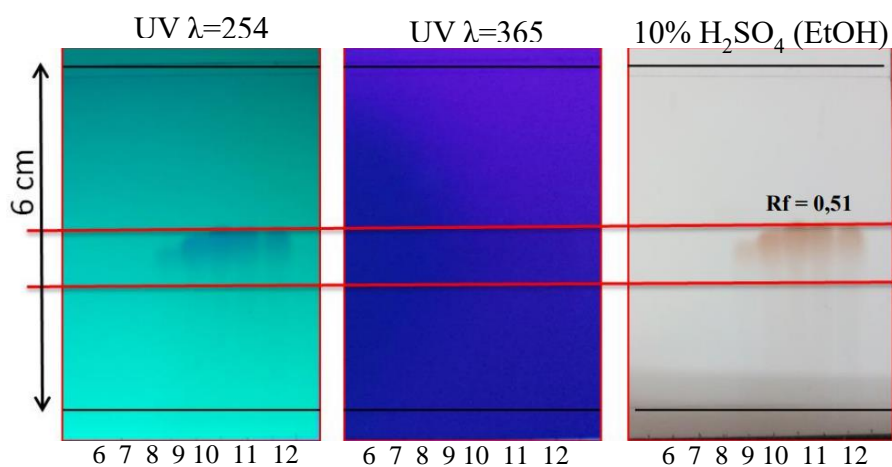

Figure S4. Chromatogram of the third separation
